# Supplementary material
Source: Springer Nature journal article supplement (https://www.springermedizin.de/resource/supplementary/13030_2007_18_MOESM3_ESM.pdf/9644556)

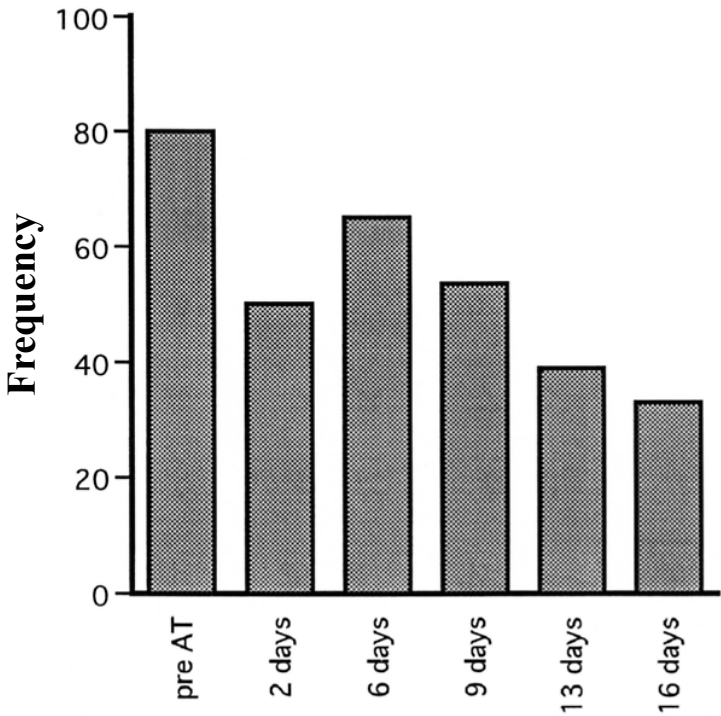

Supplement: MOESM3 [file 9644556]
